# Supplementary material for: β-Ionone Attenuates Dexamethasone-Induced Suppression of Collagen and Hyaluronic Acid Synthesis in Human Dermal Fibroblasts
Source: MDPI journal article supplement (doi:10.3390/biom11050619), 2021-04-21
Supplement: s1 [file s1]

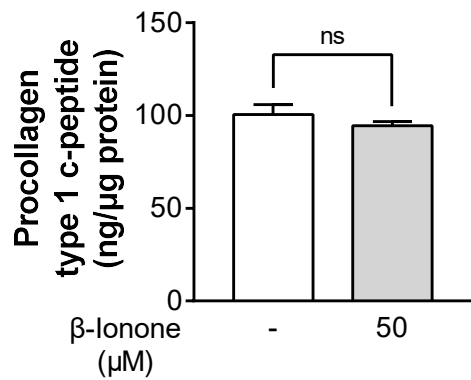

**Supplementary Figure 1.** β-Ionone treatment has no effect on the collagen synthesis in the basal model. The cells were treated with vehicle (dimethyl sulfoxide) or β-ionone (50 μM) for 24 h and the procollagen type I c-peptide content was measured in the culture supernatants of the dermal fibroblasts. Values are shown as mean ± standard error of the mean (SEM) of three experiments. Statistical significance is expressed as follows: ns, not significant ( $p > 0.05$ ).

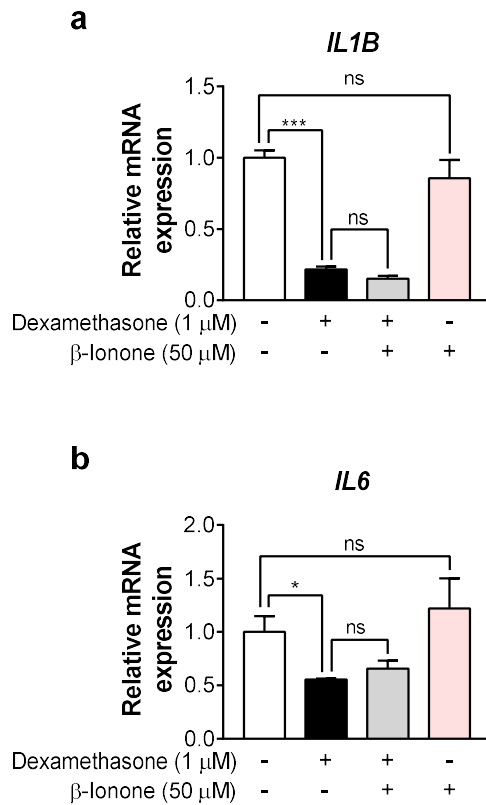

**Supplementary Figure 2.** β-Ionone has no effect on the expression of pro-inflammatory genes in human dermal fibroblasts. (a,b) The cells were treated with vehicle (DMSO), dexamethasone (1 μM) or β-ionone (50 μM) for 12 h and gene expression levels of interleukin 1 beta (IL1B) and IL6 were measured. Values are shown as mean ± standard error of the mean (SEM) of three experiments. Statistical significance is expressed as follows: ns, not significant ( $p > 0.05$ ), \* $p < 0.05$ , \*\*\* $p < 0.001$ .

**Supplementary Table 1.** Primer sequences.

| Gene description                                                    | Sequence (5'→3')                                            |
|---------------------------------------------------------------------|-------------------------------------------------------------|
| Annexin A4<br>( <i>ANXA4</i> )                                      | F: ACCAGCAGCAATATGGACGG<br>R: TTCGGTTCGGGAACAGAG            |
| AT-rich interaction domain 5b<br>( <i>ARID5B</i> )                  | F: GCAGTCACATGCTGTAGCTTTC<br>R: TCTTCTTGTGGGCATGGTTTC       |
| B-cell lymphoma 6<br>( <i>BCL6</i> )                                | F: GTCCTGCAGCAGTAAGAATGCCTG<br>R: GGCTGTTGAGCACGATGAACTTGT  |
| Collagen type I $\alpha$ 1 chain<br>( <i>COL1A1</i> )               | F: ACATGTTTCAGCTTTGTGGACC<br>R: TGTACGCAGGTGATTGGTGG        |
| Collagen type I $\alpha$ 2 chain<br>( <i>COL1A2</i> )               | F: CGGACTTTGTTGCTGCTTGC<br>R: CAGCAAAGTTCCCACCGAGA          |
| DNA damage inducible transcript 4<br>( <i>DDIT4</i> )               | F: TGAGGATGAACACTTGTGTGC<br>R: CCAACTGGCTAGGCATCAGC         |
| Dual specificity phosphatase 1<br>( <i>DUSP1</i> )                  | F: TGGAGGAAGGGTGTTCCTCC<br>R: CAAGGCAGATGGTGGCTGA           |
| ErbB receptor feedback inhibitor 1<br>( <i>ERRFI1</i> )             | F: GGCCTCACAGGTTTGAGATG<br>R: TTCATCGGAGCAGATTTGGAAG        |
| FK506 binding protein 5<br>( <i>FKBP5</i> )                         | F: GTCCAAAGCCTCAGAGTCGTTTC<br>R: AGCCTTCTCATTGGCACTGTC      |
| Glyceraldehyde-3-phosphate dehydrogenase<br>( <i>GAPDH</i> )        | F: TCTGGAAAGCTGTGGCGTGA<br>R: TACTTGGCAGGTTTCTCCAGG         |
| Glucocorticoid-induced leucine zipper<br>( <i>GILZ</i> )            | F: TCCTGTCTGAGCCCTGAAGAG<br>R: AGCCACTTACACCGCAGAAC         |
| Glutamate-ammonia ligase<br>( <i>GLUL</i> )                         | F: AGAAGAGCGGAGCGTGTGAG<br>R: CATGGTGGAAGGTGTTCTGGTC        |
| Hyaluronic acid synthase 2<br>( <i>HAS2</i> )                       | F: GAGCAGCCCATTGAACCAGA<br>R: AGGAAGCGCAGAAATTGGGAG         |
| Interleukin 1 beta<br>( <i>IL1B</i> )                               | F: GAGCTCGCCAGTGAAATGATGG<br>R: CTTGCTGTAGTGGTGGTCGG        |
| Interleukin 6<br>( <i>IL6</i> )                                     | F: TGCAATAACCACCCCTGACC<br>R: GTGCCCATGCTACATTTGCC          |
| Kruppel-like factor 13<br>( <i>KLF13</i> )                          | F: ACGCCAACCTCCACCCAG<br>R: TTCGCTCAGCTTTCCTATTACC          |
| Metallothionein 1E<br>( <i>MT1E</i> )                               | F: CCCTTTGCTCGAAATGGA<br>R: GGGTTTGTGTCCACGAG               |
| Metallothionein 2A<br>( <i>MT2A</i> )                               | F: GCTCCTGCAAATGCAAAGAGTG<br>R: CTTGTCCGACGCCCTTTG          |
| Nuclear factor $\kappa$ B inhibitor $\alpha$<br>( <i>NFKBIA</i> )   | F: AGCACAAAGAGAGTGTCCG<br>R: CAGCGTTCATGGTTATGG             |
| Phosphoinositide-3-kinase regulatory subunit 1<br>( <i>PIK3R1</i> ) | F: AGCATTGGGACCTCACATTACACA<br>R: ACTGGAAACACAGTCCATGCACATA |
| Serum deprivation response protein<br>( <i>SDPR</i> )               | F: AGTCACGGTGCTCACGCTCC<br>R: GTTGCTGGTGGAGGCCTGGT          |
| Solute carrier family 19 member 2<br>( <i>SLC19A2</i> )             | F: AGCCAGACCGTCTCCTTGTA<br>R: TAGAGAGGGCCACACAC             |
| Zinc fingers and homeoboxes 3<br>( <i>ZHX3</i> )                    | F: GGTGTCTGAGAACAGTGAGTCG<br>R: GCAGGCGGTTTCCAGACTGG        |
